# Supplementary material for: The influence of complex and threatening environments in early life on brain size and behaviour
Source: PubMed Central journal article supplement (PMC4795028; doi:10.1098/rspb.2015.2564), 2016-01-27
Supplement: rspb20152564supp1.pdf [file rspb20152564supp1.pdf]

Figure 1 SM.

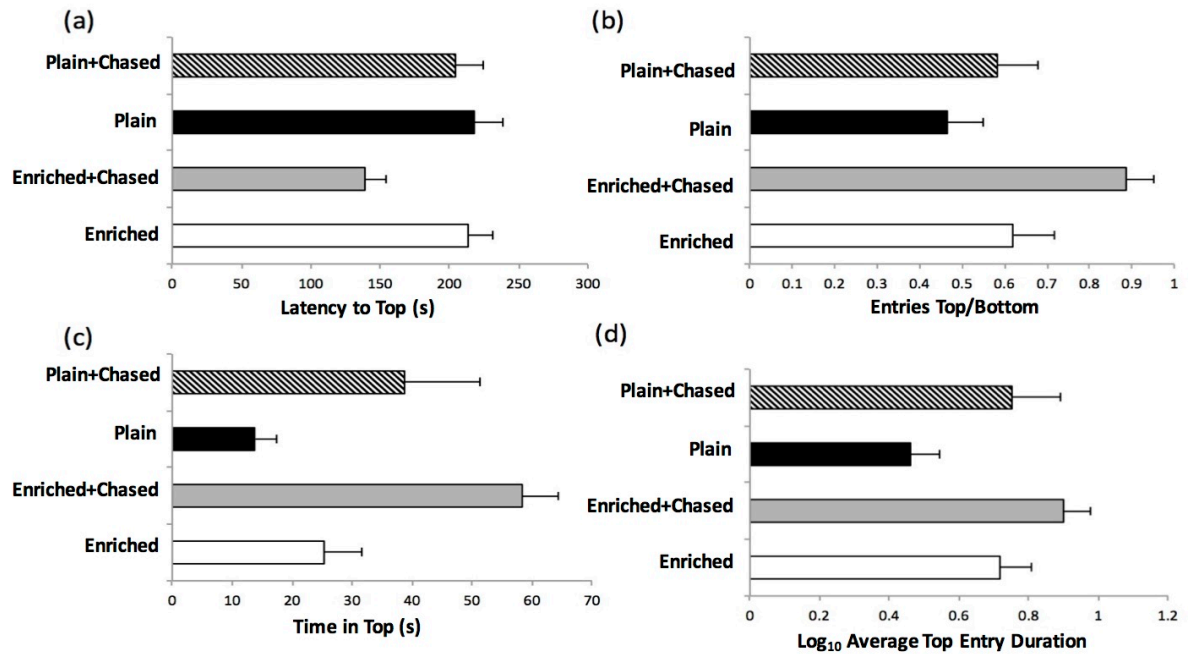

Differences in behaviours between juveniles from different treatments in the novel tank diving test. (a) Latency to top, (b) Entries in top/bottom, (c) Time in top and (d) Log<sub>10</sub> Average top entry duration.

Table 1 SM: Summary of behaviours measured for juvenile fish in the novel tank diving test. Adapted from Cachat et al. [34].

| Behaviour (units)                                                                                  | Increasing value indicates |
|----------------------------------------------------------------------------------------------------|----------------------------|
| Latency to enter the top (s)                                                                       | Lower anxiety levels       |
| Ratio of entries to top/bottom                                                                     | Lower anxiety levels       |
| Time spent in top (s)                                                                              | Lower anxiety levels       |
| Average top entry duration (s) (time spent in the top divided by the number of entries to the top) | Lower anxiety levels       |
| Freezing duration (s)                                                                              | Higher anxiety levels      |
| Movement rate (number of grid lines crossed/min)                                                   | Lower anxiety levels       |

Table 2 SM: Comparison of behaviours in juvenile fish during the novel tank diving test.

\* Indicates significant difference.

|                                     | Enrichment           |                               | Chasing                |                                |
|-------------------------------------|----------------------|-------------------------------|------------------------|--------------------------------|
|                                     | Mean ± SE (Enriched) | F-value; P-value              | Mean ± SE (Chasing)    | F-value; P-value               |
|                                     | Mean ± SE (Plain)    |                               | Mean ± SE (No-Chasing) |                                |
| <b>Latency to enter top (s)</b>     | 176.33 ± 13.15       | $F_{1,68} = 3.51; P = 0.06$   | 215.73 ± 13.49         | $F_{1,68} = 5.60; P = 0.02^*$  |
|                                     | 211.16 ± 14.26       |                               | 171.76 ± 13.57         |                                |
| <b>Number of entries top/bottom</b> | 0.75 ± 0.06          | $F_{1,68} = 6.89; P = 0.01^*$ | 0.54 ± 0.07            | $F_{1,68} = 4.88; P = 0.03^*$  |
|                                     | 0.52 ± 0.06          |                               | 0.73 ± 0.06            |                                |
| <b>Time in top (s)</b>              | 41.83 ± 5.14         | $F_{1,68} = 3.89; P = 0.05^*$ | 19.51 ± 4.77           | $F_{1,68} = 13.44; P < 0.01^*$ |
|                                     | 26.22 ± 6.84         |                               | 48.55 ± 6.11           |                                |
| <b>Top entry duration (s)</b>       | 7.81 ± 1.49          | $F_{1,68} = 4.00; P = 0.05^*$ | 4.35 ± 0.63            | $F_{1,68} = 5.48; P = 0.05^*$  |
|                                     | 10.05 ± 5.92         |                               | 13.51 ± 5.98           |                                |
| <b>Freezing duration (s)</b>        | 48.57 ± 8.86         | $F_{1,68} = 6.71; P = 0.01^*$ | 83.81 ± 11.73          | $F_{1,68} = 2.31; P = 0.13$    |
|                                     | 92.99 ± 14.74        |                               | 57.75 ± 13.29          |                                |
| <b>Movement rate (lines/min)</b>    | 35.06 ± 1.87         | $F_{1,68} = 1.88; P = 0.18$   | 30.41 ± 2.25           | $F_{1,68} = 2.66; P = 0.11$    |
|                                     | 30.82 ± 2.50         |                               | 35.46 ± 2.14           |                                |
